# Supplementary material for: Simulations of Spectral Polarimetric Variables measured in rain at W-band
Source: Copernicus journal article supplement (doi:10.5194/egusphere-2024-3164), 2025-01-02
Supplement: Supplementary file [file egusphere-2024-3164-RC2-supplement.pdf]

The manuscript under revision presents a comparison of simulated and measured spectral polarimetric variables at W-band. The analysis is done for rain assuming well known size-shape-velocity relations for raindrops. The manuscript clearly shows that more investigation is required for cloud radars to accurately simulate the spectra. The study is of a great importance for the cloud radar community. I have one major comment and several minor comments. I believe addressing these comments can considerably improve the manuscript.

Major comment:

1. Even though the Sec.2.2 is in general clear, there is a lack of explanation why it is necessary to generate noisy spectra using I/Q components. In general, average spectra can be used. These can be derived simply by adding spectral noise power to  $S_{vv}$  and  $S_{hh}$  (as it is done in Eq. 14 of the manuscript). Assuming no correlation between noise in the two orthogonal channels, on average there is no effect on  $S_{hv}$ . The variance of spectral  $S_{vv}$ ,  $S_{hh}$ , and  $S_{hv}$  taking into account the number of averaged spectra can be found as demonstrated in Myagkov and Ori 2022 (<https://amt.copernicus.org/articles/15/1333/2022/>). My question is, what are the benefits of generation of random individual spectra instead of the average ones? Please clarify this in the manuscript.

Minor comments:

1. L. 2 Change „spectral differential correlation coefficient“ to “spectral correlation coefficient”
2. L. 6 “W band millimeter-wavelength radar” keep either W-band or millimeter-wavelength, these two terms are kind of redundant
3. I have a feeling that some sentences in the introduction are not well connected to each other. I recommend reformulating the text to improve the reading flow:
  - a. L12-18 are about cloud radars. L.18-20 start with “Additionally” and emphasize advantages of polarimetry in precipitation radars, and then afterwards there is a jump back to cloud radars.
  - b. L24-29 I understand what is meant here, but for a general reader this might be confusing. I would recommend the following sequence: Integrated variables at centimeter-wavelength are very informative. At millimeter-wavelengths signatures in integrated polarimetric variables become less pronounced. Spectral polarimetry in cloud radars is better because different particle sizes are observed independently.
  - c. L29-38 I recommend making a separate paragraph and to indicate that these are some of advanced applications of polarimetric measurements at W-band.
4. The introduction section does not explain the novelty of the study, although the manuscript definitely shows novel results of comparison between state-of-the art simulations and real measurements. In the sentence (L50), there is one sentence stating that the goal is to describe the simulation. But I think the goal is much more than that,

the study shows a comparison between an advanced spectral modelling based on empirical knowledge about rain drops (including size-shape relations, size-velocity dependence, turbulence, orientation etc) and real observations. And I would put the goal of the study in the end of paragraph, i.e. after existing simulation studies have been discussed.

5. I am just curious, what is the reasoning to use a Eq.1 apparently based on studies before 2001 as a reference? And why using Thurai et al. 2008 as the second relation? Would not one be enough? Or is there a reason why two are needed, especially taking into account that the scattering simulations are often hard to distinguish in the figures?
6. Sigma on the y-axis in Fig. 2 should have VV as the subscript not just V.
7. L118-121 for me it is hard to follow these sentences. I would recommend to simply write that the broader the width of the canting angle distribution is, the lower the magnitude of the polarimetric variables.
8. Instead of Fig3 right/left I would recommend marking the panels (a) and (b) and refer to panels using these marks.
9. L124-125, elements  $Z_{ij}$  are not elements of the backscattering matrix but the Müller matrix, or as it is called in the manuscript, the phase matrix
10. L129-134 and Fig 4. Please mention that neither antenna pattern effects, nor antenna coupling for the quasi-bistatic radar configuration, nor multiple scattering, nor noise are included in the calculations of  $\rho_{hv}$  at this stage. One or a combination of these effects may drive  $\rho_{hv}$  below the stated minimum value.
11. Sec.2.1.2 again here, why using 2 parameterizations?
12. L281 Why would one expect the opposite? If I understood correctly, the same  $S_{vv}, S_{hh}$ , and  $S_{hv}$  were used for both methods. The difference is only in the randomness introduced by stochastic sampling. The averaged values are expected to be the same.
13. L283 I recommend to avoid using the term correlation, when "agreement" is meant. Please check this throughout the manuscript
14. L287 L318 I see a significant difference between simulations and measurements in Fig. 8 at 5 m/s. Please check your conclusion about close alignment up to 7 m/s. Also, I do not see any noticeable differences at 3.5 m/s as written in the following sentence.
